# Supplementary material for: Corrigendum to &quot;The relative roles of CO&lt;sub&gt;2&lt;/sub&gt; and palaeogeography in determining late Miocene climate: results from a terrestrial model–data comparison&quot; published in Clim. Past, 8, 1257–1285, 2012
Source: Copernicus journal article supplement (doi:10.5194/cp-10-199-2014), 2014-01-24
Supplement: Supplementary file 1 [file cp-10-199-2014-supplement.pdf]

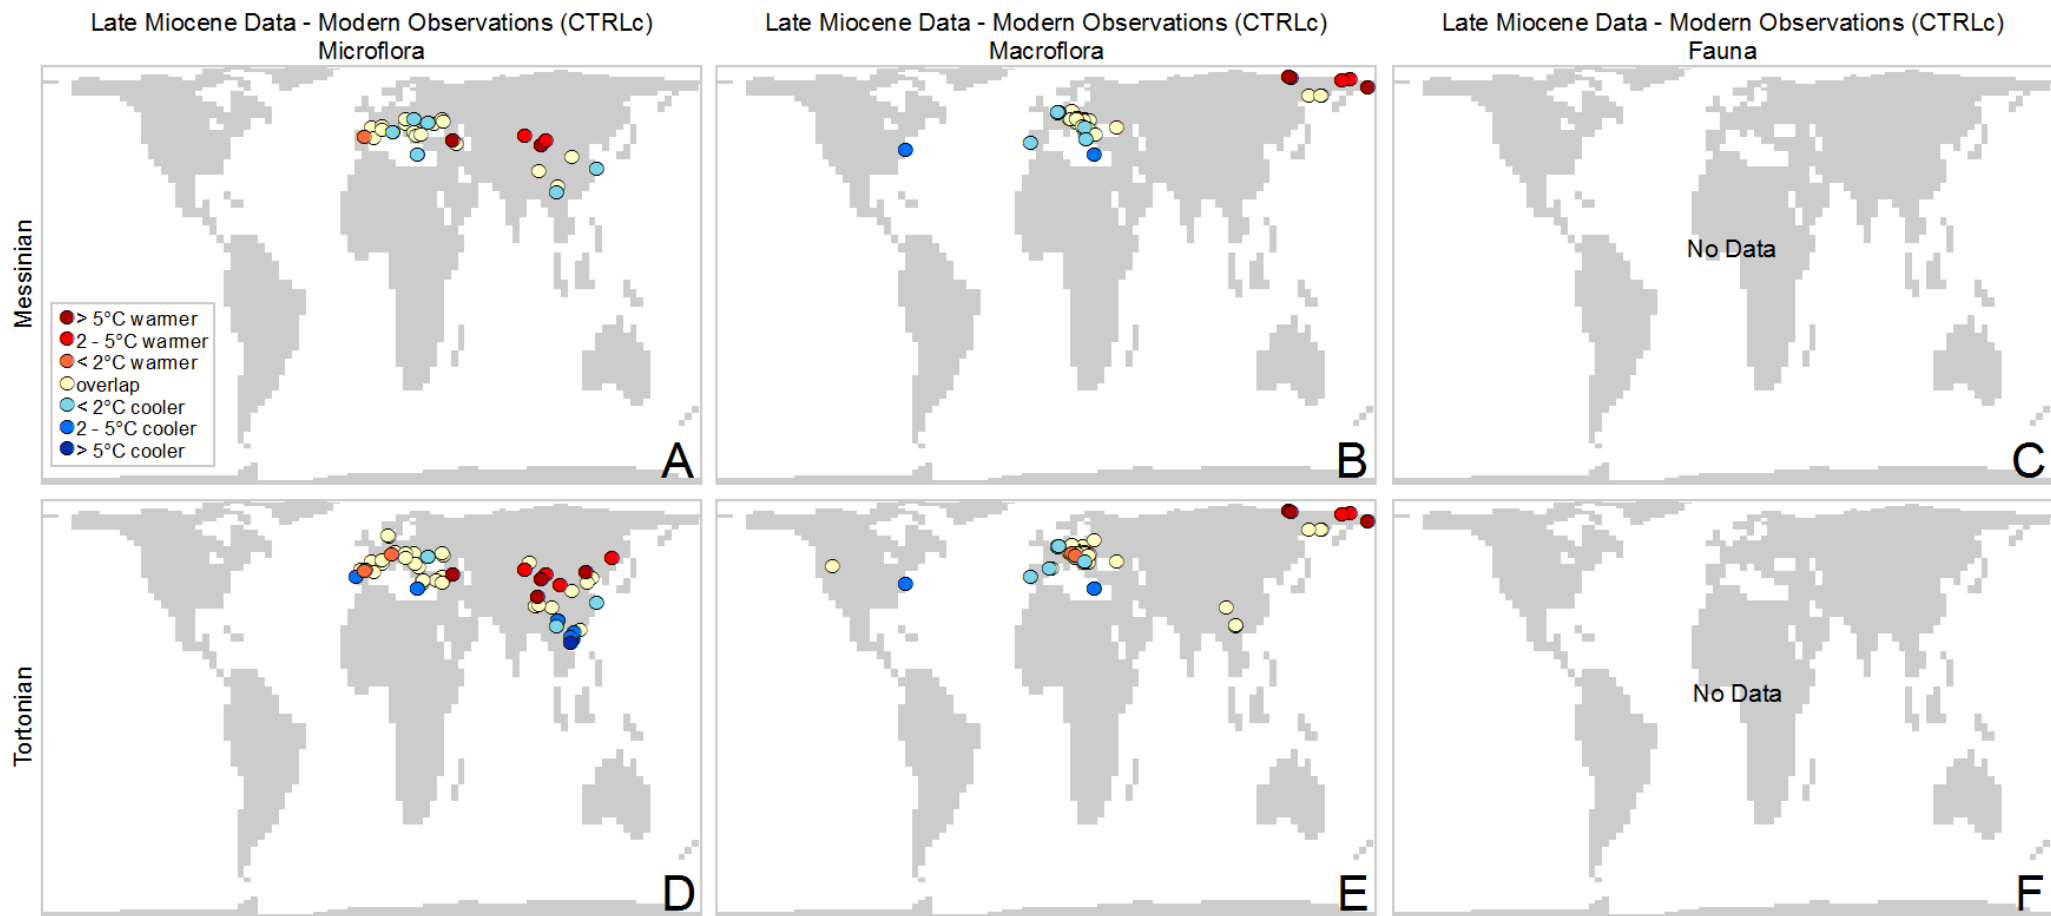

Fig. S1. Results from the model-data comparison for mean cold month temperature, late Miocene data – modern potential natural climate estimates.

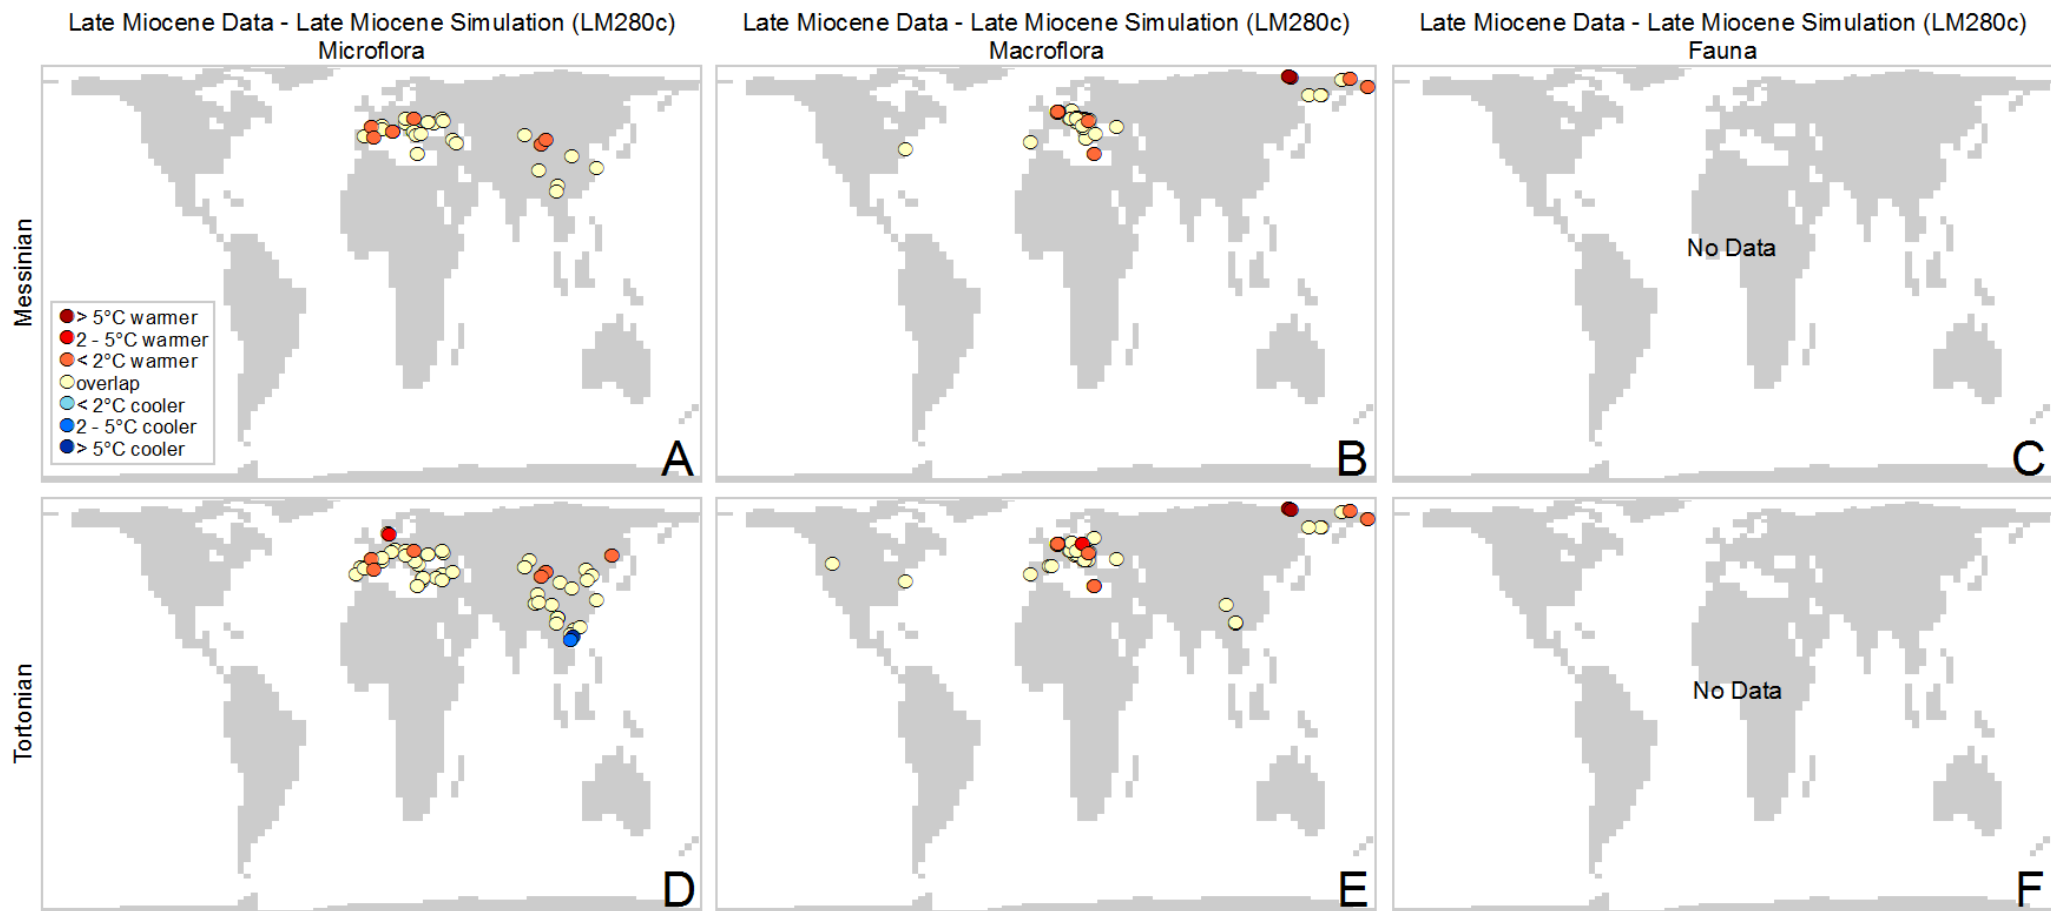

Fig. S2. Results from the model-data comparison for mean cold month temperature, late Miocene data – LM280c.

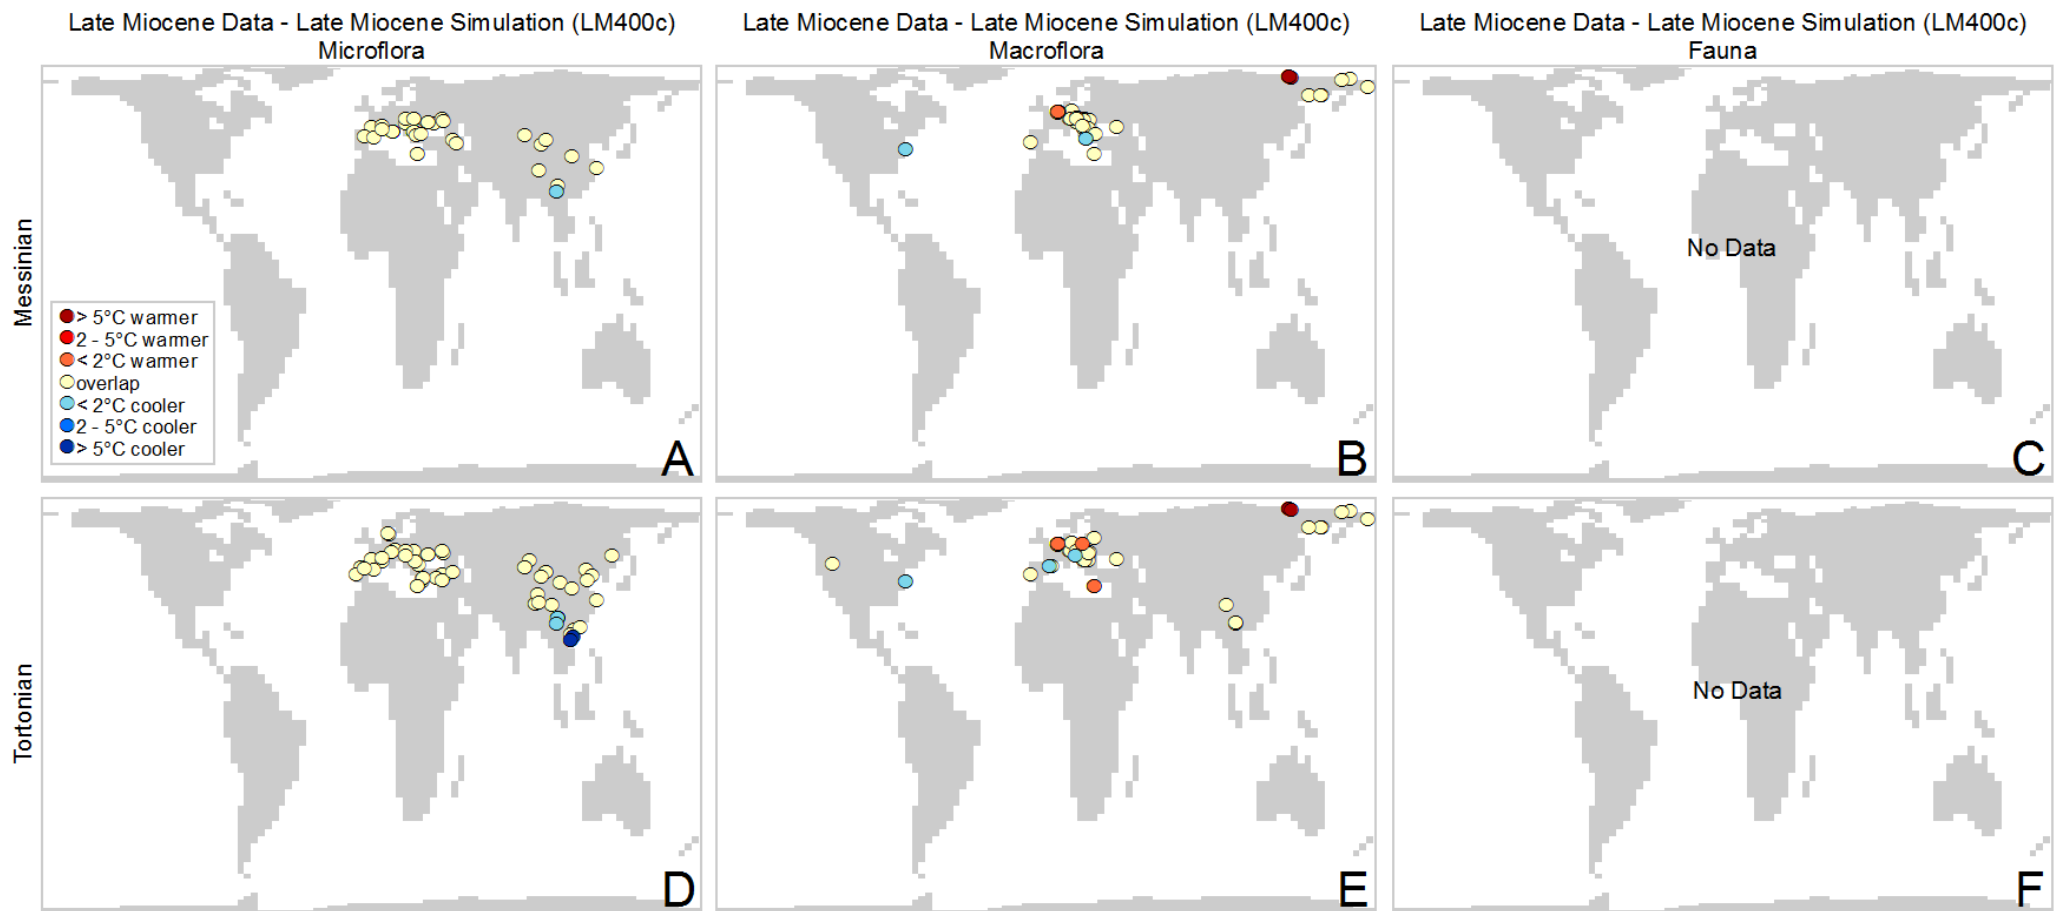

Fig. S3. Results from the model-data comparison for mean cold month temperature, late Miocene data – LM400c.

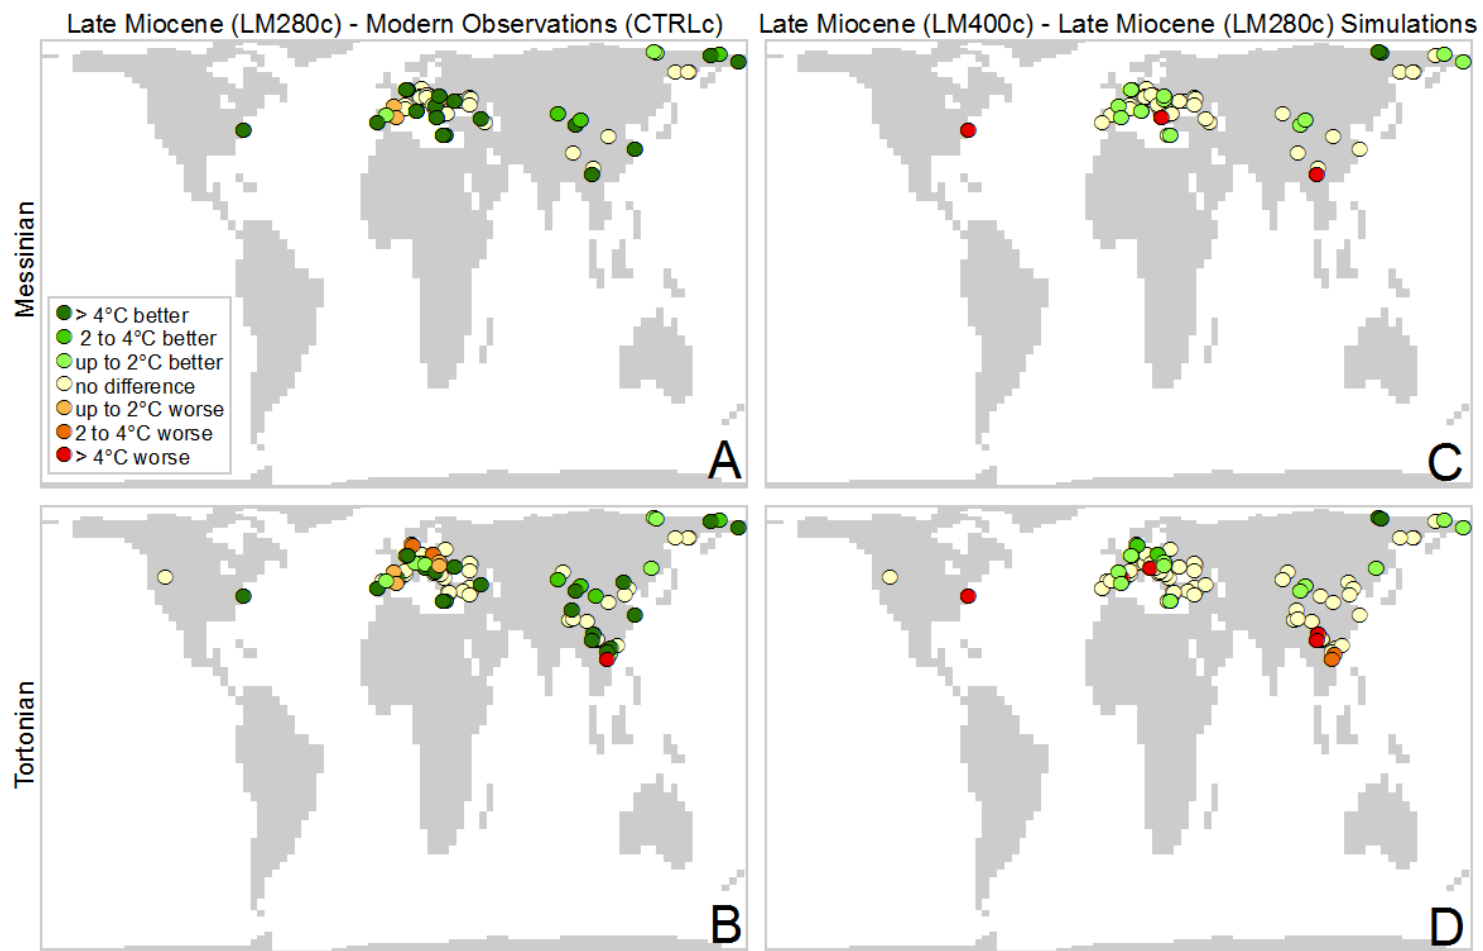

Fig. S4. Improvements in the model-data comparison for mean cold month temperature. The lefthand column (A,B) shows the improvement that the late Miocene palaeogeography makes to the model-data comparison. The righthand column (C, D) shows the improvement that higher CO<sub>2</sub> makes to the model-data comparison. Green circles indicate an improvement, red circles indicate a deterioration. The datapoints showing 'no difference' are plotted underneath the other datapoints in order to highlight the differences.

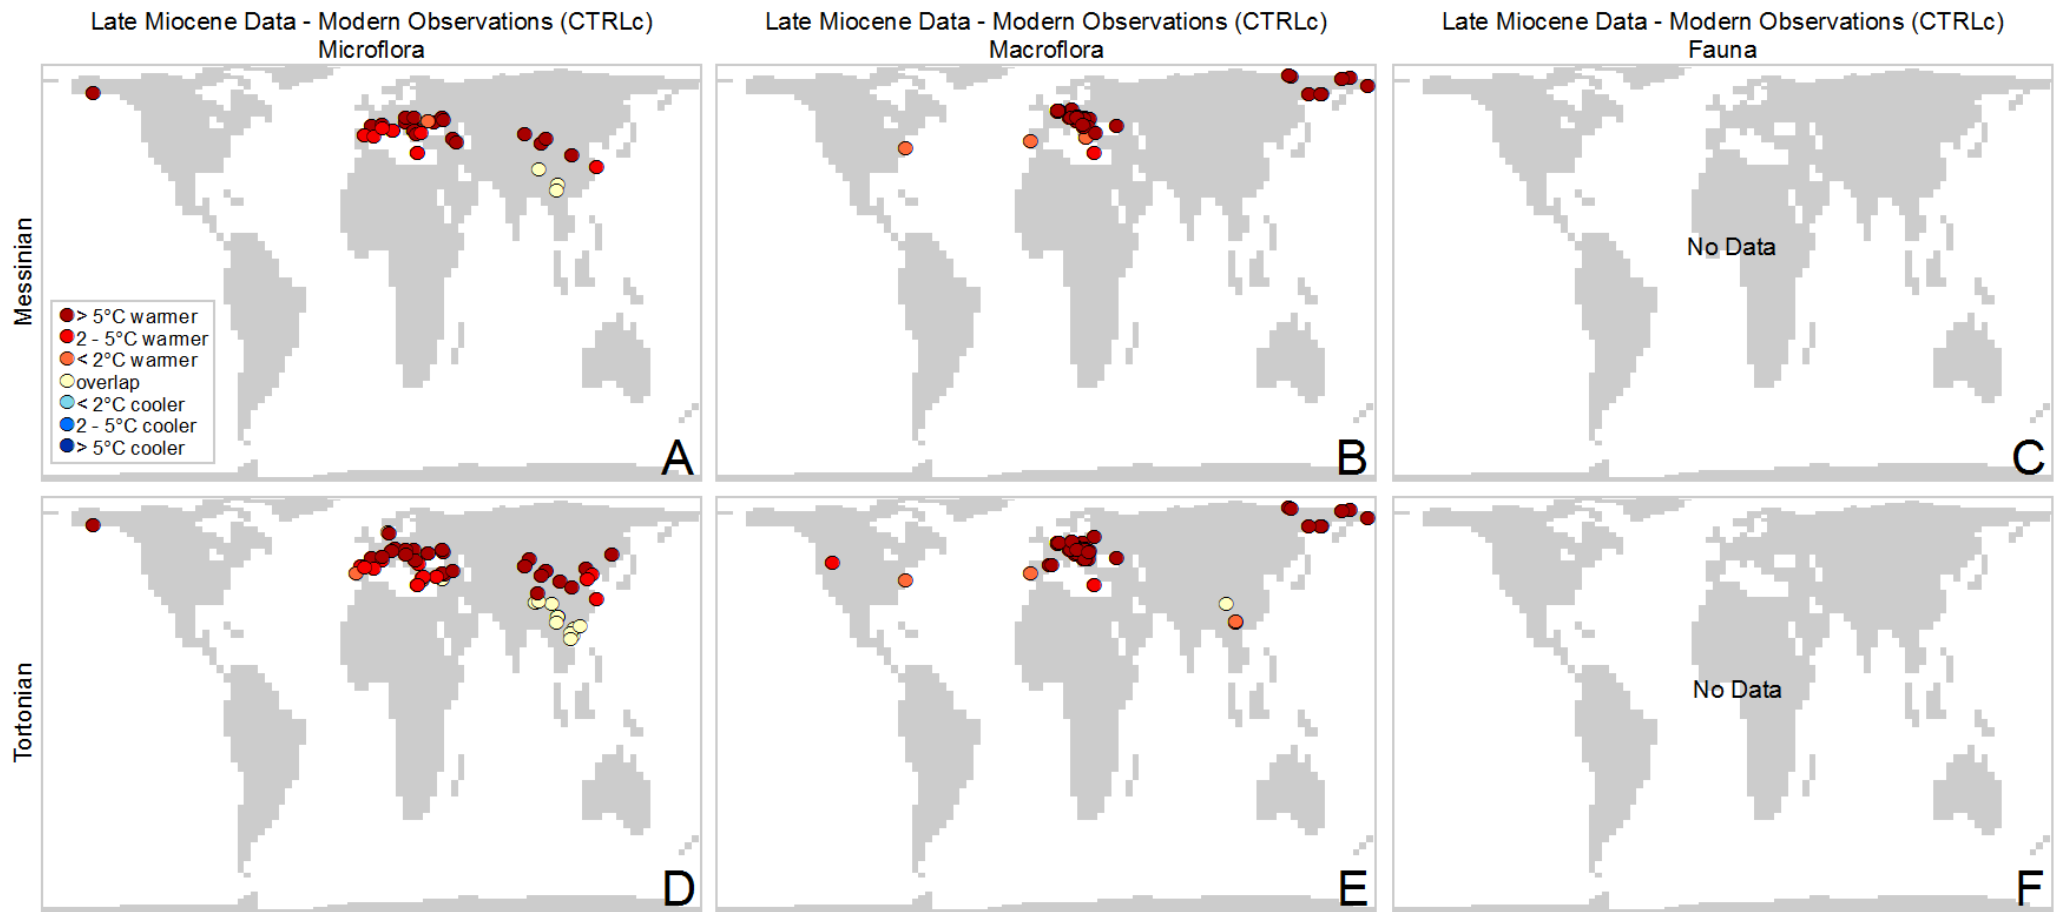

Fig. S5. Results from the model-data comparison for mean warm month temperature, late Miocene data – modern potential natural climate estimates.

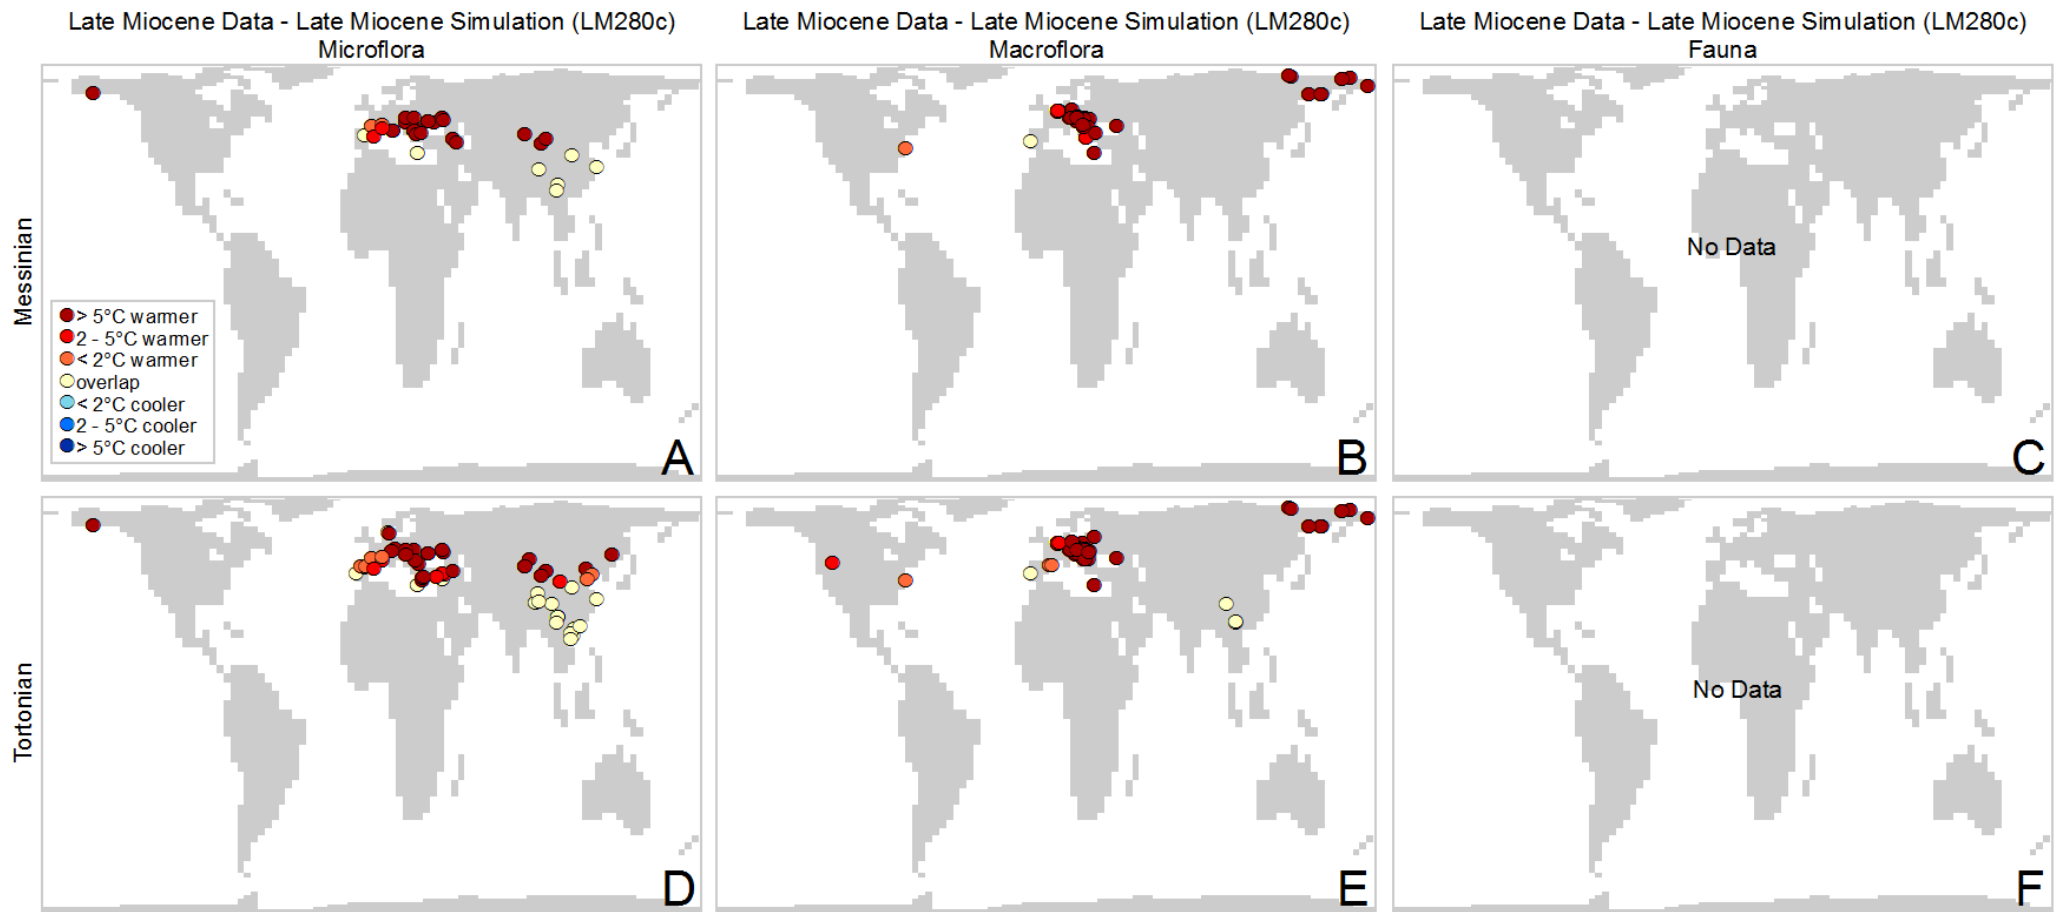

Fig. S6. Results from the model-data comparison for mean warm month temperature, late Miocene data – LM280c.

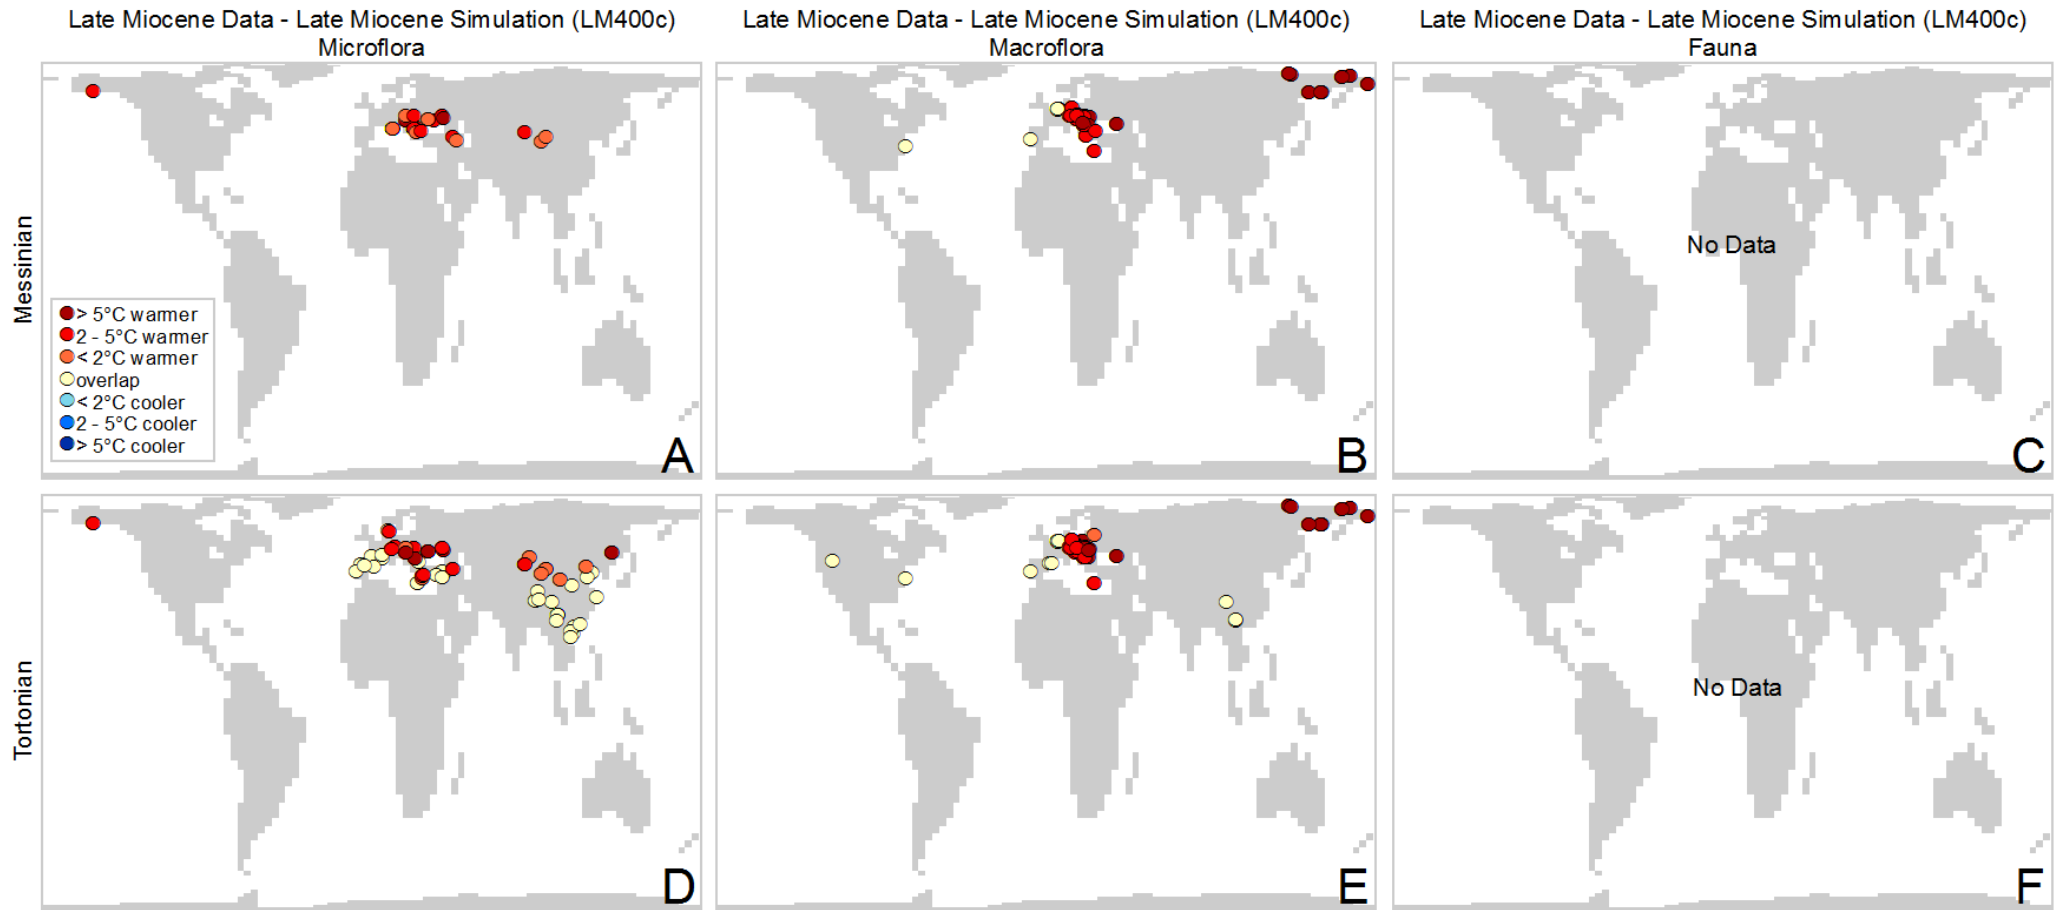

Fig. S7. Results from the model-data comparison for mean warm month temperature, late Miocene data – LM400c.

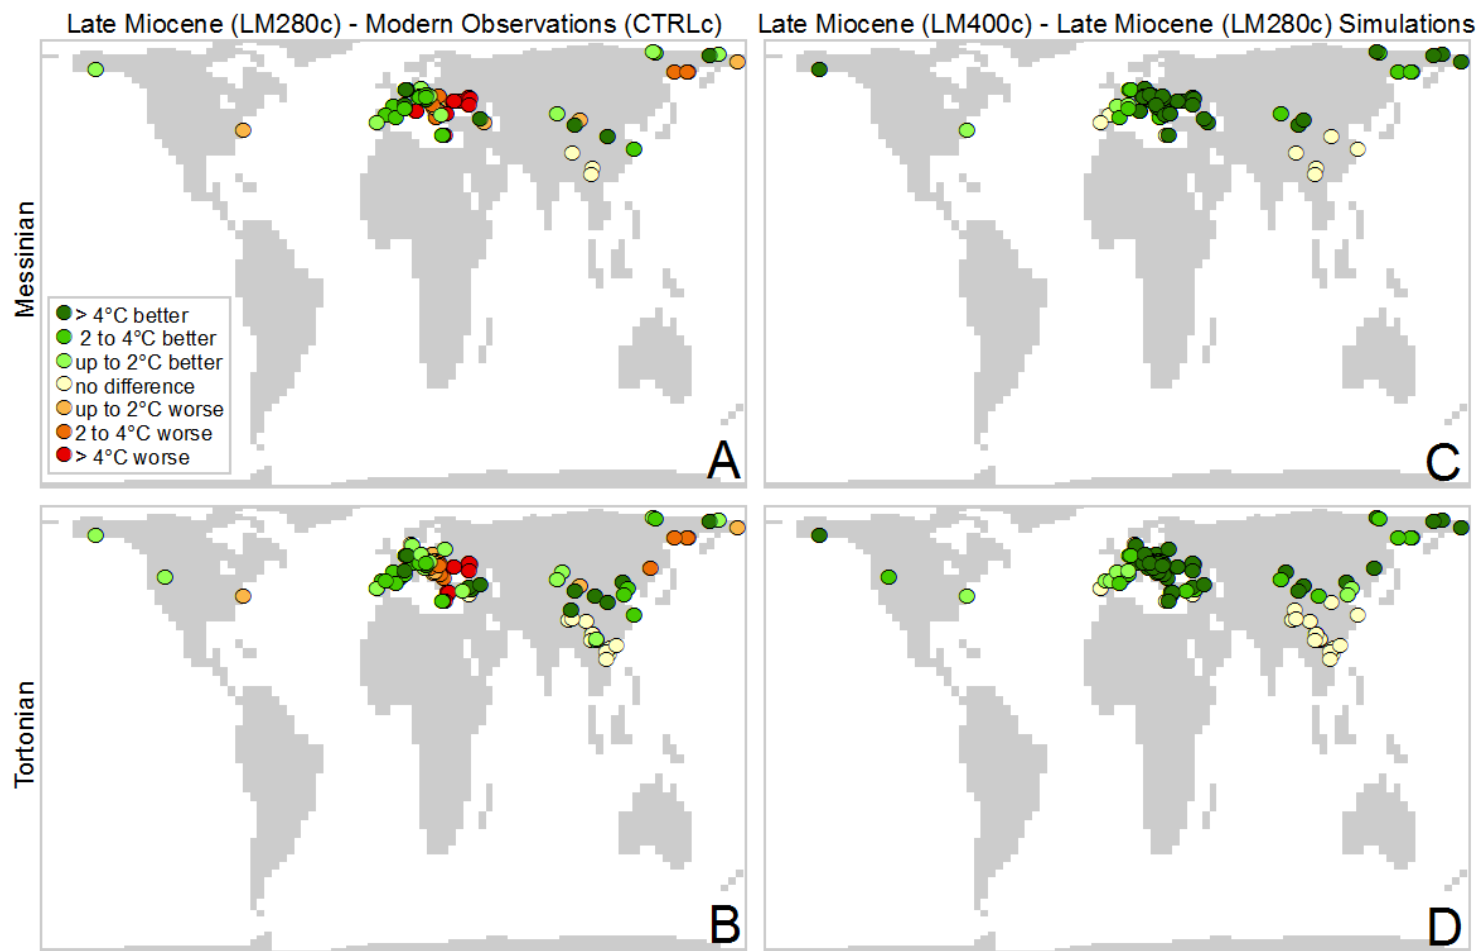

Fig. S8. Improvements in the model-data comparison for mean warm month temperature. The lefthand column (A,B) shows the improvement that the late Miocene palaeogeography makes to the model-data comparison. The righthand column (C, D) shows the improvement that higher CO<sub>2</sub> makes to the model-data comparison. Green circles indicate an improvement, red circles indicate a deterioration. The datapoints showing 'no difference' are plotted underneath the other datapoints in order to highlight the differences.



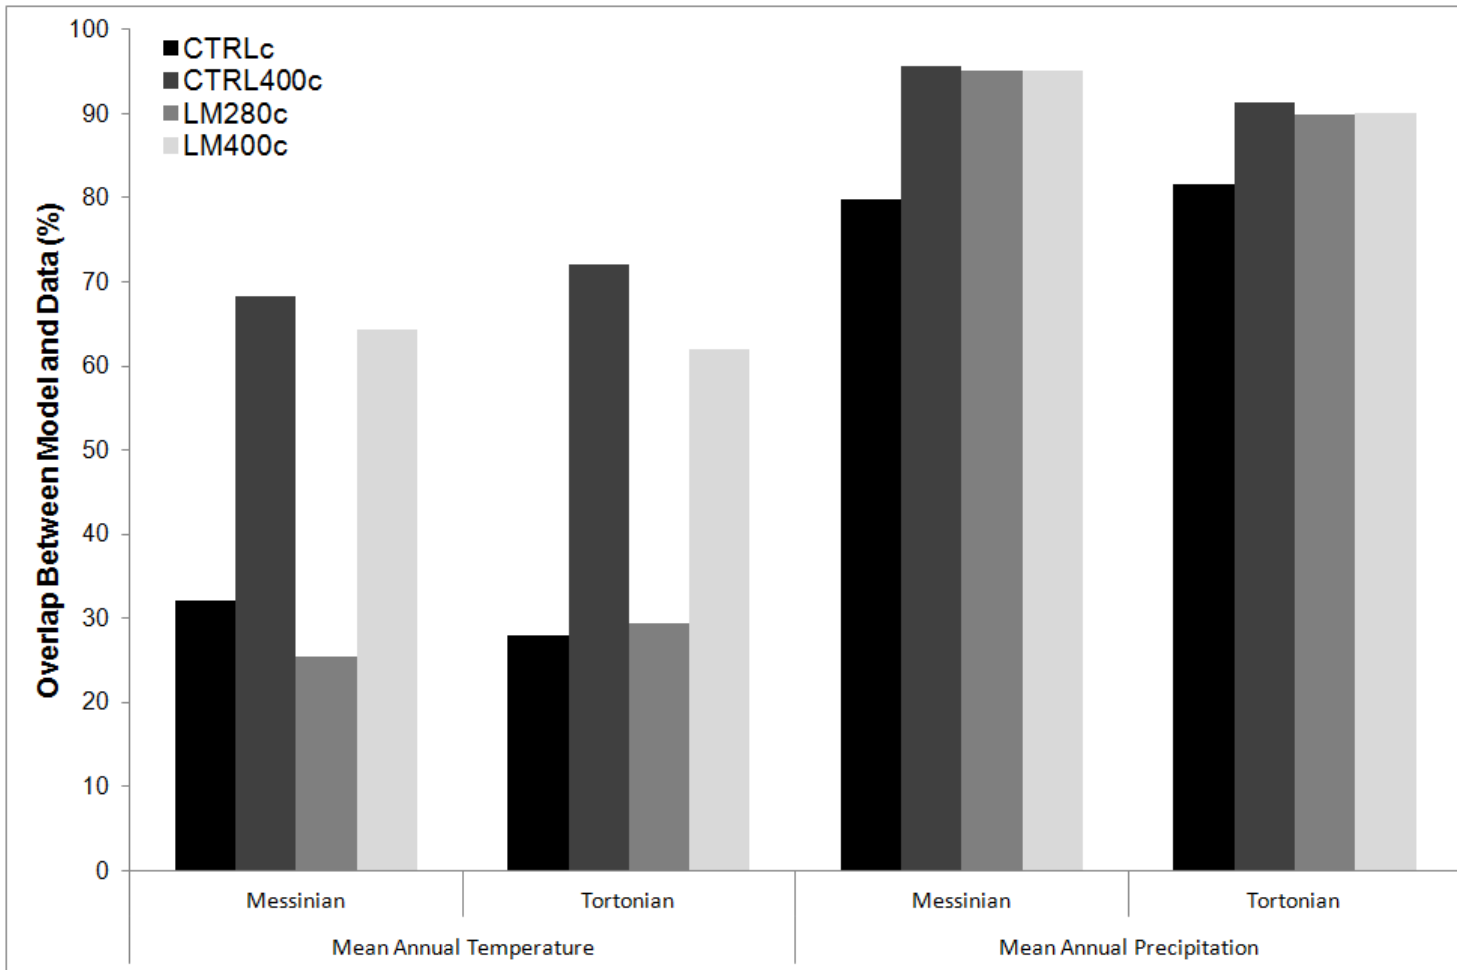

Fig. S9. Non-linearity test of model-data comparison summary for MAT and MAP. Shown is the percentage of the total number of datapoints that overlap with the model results.
